# Supplementary material for: Elucidating the enzyme network driving Amaryllidaceae Alkaloids Biosynthesis
Source: Research Square preprint supplement (doi:10.21203/rs.3.rs-4803623/v1), 2024-09-09
Supplement: Supplementary file 1 [file bcd40b004583780cf6774351.xlsx]

## Sheet: Supplementary Table S1
Supplementary Table S1. Active Site description and docking results of LaNBS (tyramine and 3,4-DHBA), LaNR (norcraugsodine), LaN4´OMT (norbelladine), and CYP96T1 and T2 (4´-O-methylnorbelladine).
	Active Site residues	Ligand	Score	Interactions
				Hydrophobic	H-bonds	Other
LaNBS	Thr24, Leu25, Leu27, Ala28, Ser31, Val38, Ile39, Leu55, Val57, Tyr59, Ile63, Ile66, His69, Glu71, Phe73, Lys83, Val85, Val87, His92, Leu95, Tyr100, Ile102, Leu104, Val120, Ser133, Phe134, Ala135, Thr136, Thr137, Pro139, Leu140, Ile143	Tyramine	-5.1	Ile39, Pro139, Ile143	Tyr59, Glu71, Ile39	nd
		3,4-DHBA	-5.5	Val85, Leu104 (n=2), Leu140, I	Glu71, Lys83,	nd
LaNR	Thr29, Gly30, Gly31, Thr32, Lys33, Gly34, Ile35, Gly36, Cys53, Ser54, Arg55, Asn56, Glu59, Cys79, Asp80, Val81, Ser82, Asn108, Ala109, Gly110, Thr111, Ala112, Ile113, Leu114, Phe127, Thr131, Ile158, Ser159, Thr160, Val161, Cys162, Ile165, Leu167, His170, Tyr173, Lys177, Pro203, Gly204, Ile205, Thr206, Thr208, Val209, Gln210, Val211, Gln212, Pro213, Phe214, Glu224, Arg265	NADPH	-ud	n.d.	Thr32, Lys33, Ile35, Arg55 (n=2), Asn56, Glu59, Asp80, Val81, Asn108, Tyr173, Lys177, Thr206 (n=3), Thr208, Val209, Gln210 (n=2)	π cation: Arg55
						Salt bridge: Lys33, Arg55
		Norcraugsodine to norbelladine	-6.29	Leu114, Val161, Val211, Phe214	Tyr173	nd
		N-demethylnarwedine o norgalanthamine	-6.6	Leu114, Leu167, Tyr173, Ile205 (n=2), Val211, Phe214	His170, Tyr173	n.d.
		Noroxopluviine to norpluvine	-6.3	Ala112, Leu114, Ile205, Gln210	Tyr173, Glu224	n.d.
		Noroxomaritidine to normaritidine	-6	Leu114, Ile205, Phe214 (n=2)	Tyr173	π cation: His170
		Noroxomaritidine to oxomaritinamine	-6	Leu114, Tyr173, Ile205, Val211	Glu224	n.d.
LaN4´OMT	SAM, Mg2+, Ser9, Leu10, Ile11, Lys13, Glu49, Trp50, Ser51, Ser52, Ala53, Asp155, Ala156, Asp157, Lys158, Asn182, Trp185, Tyr186, Gly196, Leu197, His198, Glu200, Glu201, Glu203, Cys204	SAM	-ud	Tyr81	Val55, Gly79 (n=2), Gly83, Tyr84, Asp103, Val104, Ala132, Asp157	Salt bridge Asp155
		Mg2+	ud			Metal complex Ala153, Asp155,
		Norbelladine to 4´-O-methylnorbelladine	-8,8	Ile11, Trp185, Glu201	Ser52, Asp155, Lys158, Glu200	Metal complex: Mg2+
LaCYP96T1	Heme, Phe100, Lys109, Leu112, Phe116, Phe119, Leu123, Phe124, Trp131, Arg135, Phe142, Tyr147, Gln151, Val195, Leu220, Leu224, His227, Thr303, Phe304, Leu306, Val307, Gln308, Asn310, Thr311, Leu312, Leu375, Pro380, Val381, Phe383, Glu384, Ile385, Lys386, Phe408, Pro410, Phe448, Ala449, Phe450, Ser451, Arg455, Ile456, Cys457, Leu458, Gly459, Leu462, Ala463, Gln466, Ile494, Leu495	Heme		Leu123 (n=2), Phe142, Phe304, Val307, Leu312, Leu375, Phe450, Ala463	Trp131, Ser451	Salt bridge: Lys109, Arg135, Arg455, Metal complex with Fe Cys457, Heme (n=4), H2O
		4´-O-methylnorbelladine to noroxopluviine, N-demethylnarwedine or noroxomaritidine	-10,4	Leu112, Phe116, Phe124, Leu224, Val307, Val381, Leu495	Lys109, Val307,	π cation: Phe116
LaCYP96T2	Heme, Phe100, Lys109, Leu112, Phe116, Phe119, Leu123, Phe124, Trp131, Leu220, Leu224, His227, Thr303, Leu306, Val307, Asn310, Thr311, Val381, Phe383, Glu384, Ile385, Lys386, Phe408, Phe448, Ser451, Arg455, Cys457, Ile494, Leu495	Heme		Leu123, Phe142 (n=2), Thr311, Leu375, Phe450, Ala463	Trp131, Ser451	Salt bridge: Arg135, Arg455, metal complex Cys457, Heme (n=4), H2O
		4´-O-methylnorbelladine	-10,4	Phe116 (n=2), Phe124, Leu220, Val307, Leu495	Lys109	H2O Val307

## Sheet: Supplementary Table S2
Supplementary Table S2. The accession numbers of the sequences used for phylogenetic analysis for respective protein sequence.
Supplementary Figure 1
UniProtKB/ Swiss-Prot id	phylogenetic tree
	NBS Leucojum aestivum
P15494.2	BEV1A Betula pendula
A2A1A1.2	NCS2 Coptis japonica
E6YBW4.1	PR10 Glycine max
Q43560.1	PR10-1 Medicago sativa
P93333.1	PR101 Medicago truncatula
A0A3G5BB24.1	NBS Narcissus pseudonarcissus
Q4QTJ2.1	NCS1 Papaver somniferum
Q67A25.1	NCS Thalictrum flavum subsp. Glaucum
UIP35240.1	NBS2 Narcissus papyraceus
UIP35239.1	NBS1 Narcissus papyraceus
WGU11340.1	NBS1 Crinum x powellii
XP_010911014.1	NCS2 Elaeis guineensis
KAJ6818486.1	NCS2-like Iris pallida
ANI26413.1	NCS Nelumbo nucifera
O04298.1	DAUc1 Daucus carota
P52778.1	L18A Lupinus luteus
Q9LLQ2.1	PR10.2b Lupinus luteus
O49065.1	RAP Taraxacum officinale
XP_020261032.1	NCS2-like Asparagus officinalis
XP_008800114.2	NBS-like Phoenix dactylifera
Supplementary Figure 2
UniProtKB/ Swiss-Prot id	phylogenetic tree
	LaNRII Leucojum aestivum
A7DY56.1	TRN1 Cochlearia officinalis
A0A1A9TAK5.1	NR NARPS Narcissus pseudonarcissus
P50162.1	TRN1 Datura stramonium
P50163.1	TRN2 Datura stramonium
A0A1C9II22.1	NR NARAP Narcissus aff. pseudonarcissus
P50164	TRN2 Hyoscyamus niger
H9BFQ0	TPRL1 Erythroxylum coca
H9BFQ1	TPRL2 Erythroxylum coca
H9BFQ2	TPRL3 Erythroxylum coca
P52575.1	FR Medicago sativa
E6Y2X0.1	PILR2 Linum usitatissimum
Q15GI3.1	IGS1 Petunia hybrida
Q15GI4.1	EGS1 Ocimum basilicum
B7UEU8.1	IFRH Nicotiana glauca
Q6PQJ9.1	5BPOR Digitalis lanata
AJO70763.1	ADH1 Catharanthus roseus
A0A165U5V5.1	ADH1 Euphorbia lathyris
A0A8F5XX49.1	BDH2 Salvia officinalis
UIP35234.1	LaNRI Leucojum aestivum
K7WDL7	IRIS Catharanthus roseus
Q5C9I9	ISPD Mentha piperita
A0A3Q8GL18	NEPS1 Nepeta racemosa
A4UHT7	SALR Papaver bracteatum
W8JWV8.1	8HGO Catharanthus roseus
AKF02528.1	THAS Catharanthus roseus
WGU11348.1	NNR2 Crinum powellii
QFQ50502.1	NNR Lycoris radiata
AXU39908.1	NNR1 Narcissus papyraceus
Supplementary Figure 3
UniProtKB/ Swiss-Prot id	phylogenetic tree
	OMT_clonedSeq Leucojum aestivum
Q29U70.1	I4OMT Medicago truncatulata
QFQ50503.1	N4OMT Lycoris radiata
QHN12688.1	N4OMT Lycoris longituba
AXU39905.1	N4OMT Narcissus papyraceus
A0A077EWA5.1	NOMT Narcissus aff. pseudonarcissus
Q84KK4.1	I4OMT Lotus japonicus
Q84KK6.1	I4OMT Glycyrrhyza echinata
A0A2H5AIZ6.1	NOMT Narcissus pseudonarcissus
Q6WUC1.1	6OMT Papaver somniferum
Q9LEL5.1	4OMT Coptis japonica
Q9LEL6.1	6OMT Coptis japonica
A9X7L0.1	ANMT Ruta graveolens
Q43095.1	CCoAOMT Populus tremuloides
Q8H9A8.1	COMT Coptis japonica
AAD29844.1	COMT3 Thalictrum tuberosum
Q7XB11	4OMT1 Papaver somniferum
A0A346CM52	NOMT Narcissus tazetta
Supplementary Figure 4
UniProtKB/ Swiss-Prot id	phylogenetic tree
	LaCYP96T1 Leucojum aestivum
	LaCYP96T2 Leucojum aestivum
B1NF19.1	CYP719A13 Argemone mexicana
P47195.1	CYP80A1 Berberis stolonifera
A8CDR5.1	CYP80G2 Coptis japonica
Q948Y1	CYP719A1 Coptis japonica
Q9FXW4.1	CYP80B2 Coptis japonica
B1NF18.1	CYP719B1 Papaver somniferum
Q9SP06.1	CYP80B3 Papaver somniferum
I3QBP4.1	CYP719A21 Papaver somniferum
I3V6B1.1	CYP80BX Papaver somniferum
Q8VWZ7.1	CYP76B6 Catharanthus roseus
P48522.1	CYP73A4 Catharanthus roseus
Q05001.1	CPR Catharanthus roseus
I1TEM1.1	CYP71D1V2 Catharanthus roseus
W8JCE8.1	CYP71BT1 Catharanthus roseus
W8JIT4.1	CYP71D2 Catharanthus roseus
W8JMV1.1	CYP76T24 Catharanthus roseus
W8JWW3.1	CYP72A225 Catharanthus roseus
W8JIS5.1	CYP76A26 Catharanthus roseus
Q8VWZ7.1	G10H Catharanthus roseus
I1TEM1.1	CYP71D1 Catharanthus roseus
Q9XFZ0	CYP96C1 Catharanthus roseus
A0A140IL90.1	CYP96T1 Narcissus aff. pseudonarcissus
A0A140IL91.1	CYP96T2 Narcissus aff. pseudonarcissus
A0A140IL92.1	CYP96T3 Narcissus aff. pseudonarcissus
A0A2H5AIZ9.1	CYP96T2 Narcissus pseudonarcissus
A0A2H5AJ00.1	CYP96T1 Narcissus pseudonarcissus
RVW55154.1	CYP96T1 Vitis vinifera
QFQ50505.1	CYP96T Lycoris radiata
WGU11344.1	NoroxSyn1 Crinum x powellii
NtCYP96T1	NtCYP96T1 Narcissus tete-a-tete
NtCYP96T6	NtCYP96T6 Narcissus tete-a-tete
AXU39906.1	NoroxSyn1 Narcissus papyraceus
AXU39907.1	NoroxSyn2 Narcissus papyraceus

## Sheet: Supplementary Table S3
Supplementary Table S3. List of primers used in the experiment.
S.No.	Gene	Primers	Sequence (5'-3')
1	La NBS	Forward	GGGGACAAGTTTGTACAAAAAAGCAGGCTATGAAGGGAAGTCTCTCCCAT
2	LaNBS_x3Au1	Reverse	GGGGACCACTTTGTACAAGAAAGCTGGGTCTAGATATACCTGTAAGTATCGATATACCTGTAAGTATCGATATACCTGTAAGTATCCGCTACAATAGCTTTTTGCTCCAAGAG
3	LaNR II	Forward	GGGGACAAGTTTGTACAAAAAAGCAGGCTATGTTTACAGGAAGAGAAGAGGAATCAATGCCAATGCCAATGGAGAAGAAGAGATGGTCTC
4	LaNR-II_x3flag	Reverse	GGGGACCACTTTGTACAAGAAAGCTGGGTCTACTTATCGTCGTCATCCTTATAGTCCTTATCGTCGTCATCCTTATAGTCCTTGTCGTCATCGTCTTTGTAGTCACCGTTTATGCCCCGTCCTCC
5	LaN4’OMT	Forward	GGGGACAAGTTTGTACAAAAAAGCAGGCTATGGGTGCTAGCCAAGAT
6	LaN4’OMT_x3Au5	Reverse	GGGGACCACTTTGTACAAGAAAGCTGGGTCTACAAGTAGAAGTCCGTTTTCAAGTAGAAGTCCGTTTTCAAGTAGAAGTCCGTATAAAGACGTCGACAAATAGTCACT
7	LaCYP96T1	Forward	GGGGACAAGTTTGTACAAAAAAGCAGGCTATGGCCACTTCTTCTCCAT
8	LaCYP96T1_x3myc	Reverse	GGGGACCACTTTGTACAAGAAAGCTGGGTCTACAGATCCTCCTCAGATATTAATTTTTGCTCCAAATCCTCCTCAGAGATGAGTTTTTGTTCCAGATCCTCTTCTGAGATGAGTTTTTGTTCCATGACTGATCTCTTTCCAACC
9	LaCYP96T2	Forward	GGGGACAAGTTTGTACAAAAAAGCAGGCTATGGCCACTTCTTCTCCAT
10	LaCYP96T2_x3myc	Reverse	GGGGACCACTTTGTACAAGAAAGCTGGGTCTACAGATCCTCCTCAGATATTAATTTTTGCTCCAAATCCTCCTCAGAGATGAGTTTTTGTTCCAGATCCTCTTCTGAGATGAGTTTTTGTTCCACGACTGATCTCTTTCTAACC
11	EGFP	Forward	GGGGACAAGTTTGTACAAAAAAGCAGGCTATGGTGAGCAAGGGCGAGGAGCTGTTCACC
12	EGFP_x3myc	Reverse	GGGGACCACTTTGTACAAGAAAGCTGGGTCTACAGATCCTCCTCAGATATTAATTTTTGCTCCAAATCCTCCTCAGAGATGAGTTTTTGTTCCAGATCCTCTTCTGAGATGAGTTTTTGTTCCTTGTACAGCTCGTCCATGC
13	EGFP_x3flag	Reverse	GGGGACCACTTTGTACAAGAAAGCTGGGTCTACTTATCGTCGTCATCCTTATAGTCCTTATCGTCGTCATCCTTATAGTCCTTGTCGTCATCGTCTTTGTAGTCCTTGTACAGCTCGTCCATGC
14	LaN4’OMT for N terminal fusion	Forward	GGGGACAAGTTTGTACAAAAAAGCAGGCTTCATGGGTGCTAGCCAAGAT
15	LaN4’OMT for N terminal fusion	Reverse	GGGGACCACTTTGTACAAGAAAGCTGGGTCTAATAAAGACGTCGACAAATAGTCACT
16	LaN4’OMT for C terminal fusion	Forward	GGGGACAAGTTTGTACAAAAAAGCAGGCTATGGGTGCTAGCCAAGAT
17	LaN4’OMT for C terminal fusion	Reverse	GGGGACCACTTTGTACAAGAAAGCTGGGTCATAAAGACGTCGACAAATAGTCACT
18	LaCYP96T2 for C terminal fusion	Forward	GGGGACAAGTTTGTACAAAAAAGCAGGCTATGGCCACTTCTTCTCCAT
19	LaCYP96T2 for C terminal fusion	Reverse	GGGGACCACTTTGTACAAGAAAGCTGGGTCCACGACTGATCTCTTTCTAACC

## Sheet: Supplementary Table S4
Supplementary Table S4. MRM transitions and instrumental parameters used on HPLC-MS/MS for NBS, NR and OMT experiments.
Compound name	Retention time	Precursor (m/z)	Product (m/z)	Fragmentor (V)	Collision energy	Polarity
	(min)				(V)	(ESI +/-)
3,4-dihydroxybenzaldehyde	15.602	137	119	114	20	Negative
			108		26
			92		26
3'-O-methylnorbelladine	16.988	274	137	105	18	Positive
			121		15
			109		40
4'-O-methylnorbelladine	15.808	274	137	105	18	Positive
			122		40
			94		40
3',4'-O-dimethylnorbelladine	16.824	288	151	100	10	Positive
			135		40
			107		40
Norbelladine	7.281	260	138	86	5	Positive
			123		20
			121		17
Papaverine	18.302	340	324	165	40	Positive
			202		27
			171		40
Tyramine	3.482	138	121	81	5	Positive
			91		20
			77		20
Notes: Quantifier ion for each compound is bold and qualifier ions are not.
Identification criteria used:
Retention time window (tolerance on RT): 10%
Signals with signal-to-noise ratio ≤ 3 were not considered in the analysis.
Qualifier ratio tolerance: uncertainty of 20% (relative)
Number of qualifiers used (MRM transitions monitored per compound): 3
ISTD used: Papaverine
This Table should fit on one page. The columns are too small and the words are splitted. Please fix this.

## Sheet: Supplementary Table S5
Supplementary Table S5. MRM transitions and instrumental parameters used on HPLC-MS/MS for CYP experiments
Compound name	Retention time	Precursor (m/z)	Product (m/z)	Fragmentor (V)	Collision energy	Polarity
	(min)				(V)	(ESI +/-)
3,4-dihydroxybenzaldehyde	15.641	137	119	114	20	Negative
			108		26
			92		26
3'-O-methylnorbelladine	17.001	274	137	105	18	Positive
			121		15
			109		40
4'-O, N-dimethylnorbelladine	16.033	288	137	70	14	Positive
			122		40
			94		40
4'-O-methylnorbelladine	15.823	274	137	105	18	Positive
			122		40
			94		40
11-hydroxyvittatine	4.773	288	226	105	26	Positive
			196		34
			153		40
3',4'-O-dimethylnorbelladine	16.838	288	151	100	10	Positive
			135		40
			107		40
Galanthamine	5.327	288	270	120	14	Positive
			225		18
			213		22
Haemanthamine	14.82	302	211	105	22	Positive
			196		34
			181		30
Lycorine	4.123	288	270	92	20	Positive
			177		20
			147		28
			119		40
Narwedine	10.654	286	229	95	25	Positive
			225		18
			201		26
N-demethylnarwedine	N/A	272	229	100	25	Positive
			201		25
			158		25
Norbelladine	7.296	260	138	86	5	Positive
			123		20
			121		17
Norgalanthamine	4.466	274	231	115	14	Positive
			213		18
			198		40
Normaritidine	N/A	274	256	100	25	Positive
			228		25
			196		25
Noroxomaritidine	N/A	272	244	100	25	Positive
			229		25
			212		25
Norpluviine	N/A	274	224	100	25	Positive
			147		25
			119		25
Oxomaritinamine	N/A	274	219	100	25	Positive
			165		25
			136		25
Papaverine	18.311	340	324	165	40	Positive
			202		27
			171		40
Tyramine	3.491	138	121	81	5	Positive
			91		20
			77		20
Vittatine and/or crinine	12.169	272	226	105	26	Positive
			196		34
			136		26
Notes:
Quantifier ion for each compound is bold and qualifier ions are not.
N/A: not applicable (i.e. reference standard not available)
Identification criteria used for compounds we have reference standards:
Retention time window (tolerance on RT): 10%
Signals with signal-to-noise ratio ≤ 3 were not considered in the analysis.
Qualifier ratio tolerance: uncertainty of 20% (relative)
Number of qualifiers used (MRM transitions monitored per compound): 3 (except lycorine (4))
ISTD used: Papaverine
This Table should fit on one page. The columns are too small and so the words are splitted. Please fix this.
revise O and N in italics
done

## Sheet: Supplementary Table S6
Supplementary Table S6. Instrumental parameters used in Product Ion mode on HPLC-MS/MS for CYP experiments
Precursor	Start mass	End mass	Fragmentor	Collision energy
(m/z)	(m/z)	(m/z)	(V)	(V)
272	50	275	100	25
274	50	280	100	25

## Sheet: Supplementary Table S7
Supplementary Table S6. Summary of in vivo enzymatic assay
	Product
	Norbelladine	4'-O-methylnorbelladine	N-demethylnarwedine	Norgalanthamine	Noroxomaritidine	Oxomaritinamine	Normaritidine	Vittatine and/or crinine	Haemanthamine	Norpluviine	Lycorine
Leaf	---	---	---	---	---	---	---	---	---	---	---
EGFP	---	---	---	---	---	---	---	---	---	---	---
LaNBS+LaNRII	***	---	---	---	---	---	---	---	---	---	---
LaNBS+LaNRII+LaN4'OMT	***	***	---	---	---	---	---	---	---	---	---
LaNBS+LaNRII+LaN4'OMT+LaCYP96T1	***	***	-**	-**	***	---	***	***	***	***	***
LaNBS+LaNRII+LaN4'OMT+LaCYP96T2	***	***	-*-	***	***	---	***	---	---	***	***
Feeding tyramine and 3,4-dihydroxybenzaldehyde each experiment was performed in triplicates and respective product detected/or not by HPLC-MS/MS is represented by three consecutive signs for each experiment in product column. Small dash line in black color represents no signal detected for the compound. Green asterisk sign * represents detection and identification of the compound by Multiple Reac…
